# Supplementary material for: Effectiveness of a Digital Health Application for the Treatment of Diabetes Type II—A Pilot Study
Source: MDPI journal article supplement (doi:10.3390/jcm12196317), 2023-09-30
Supplement: s1 [file s1]

Screenshots of the App

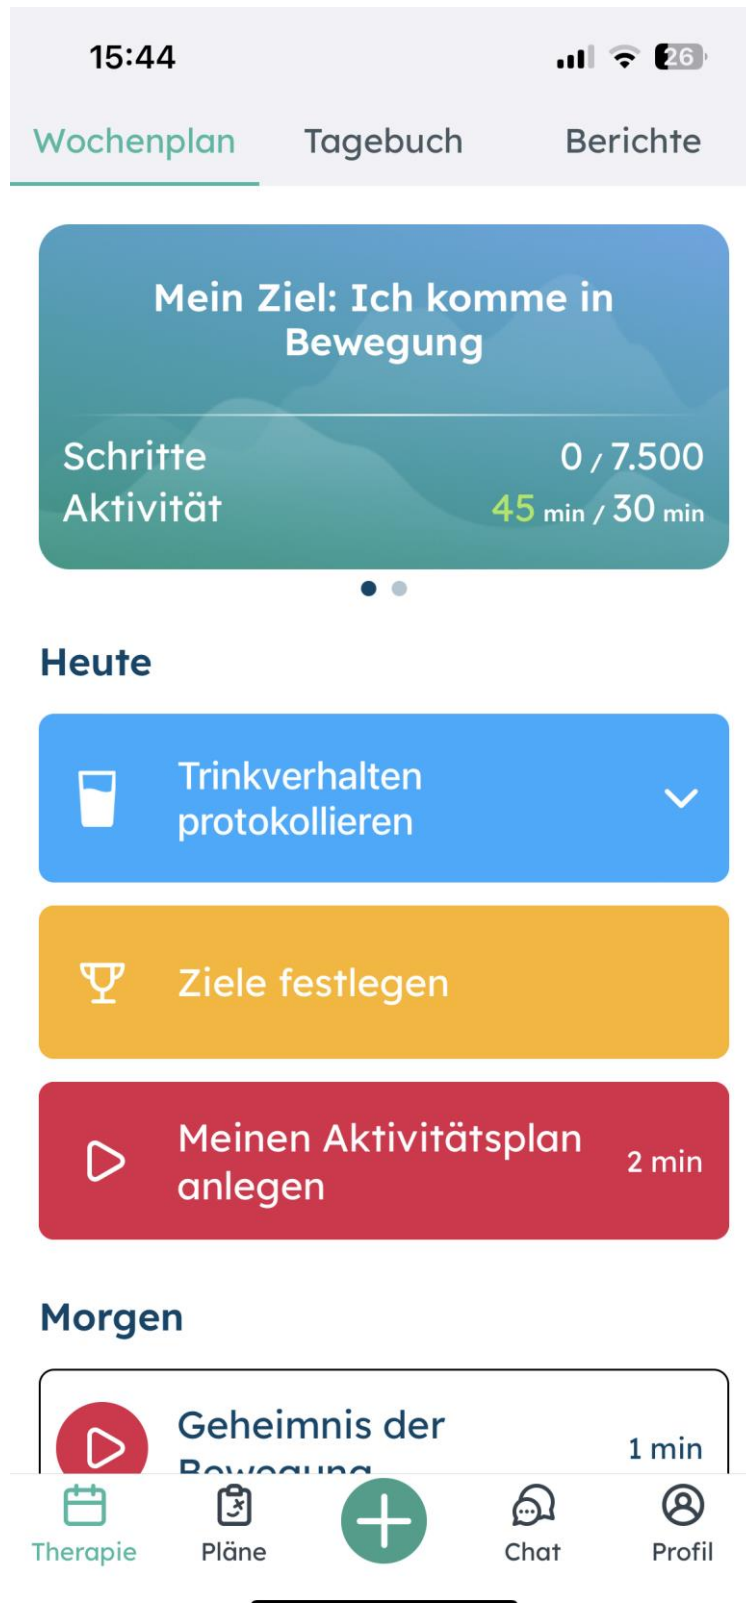

Figure S1. Home screen with personal goals, activity, and water tracking.

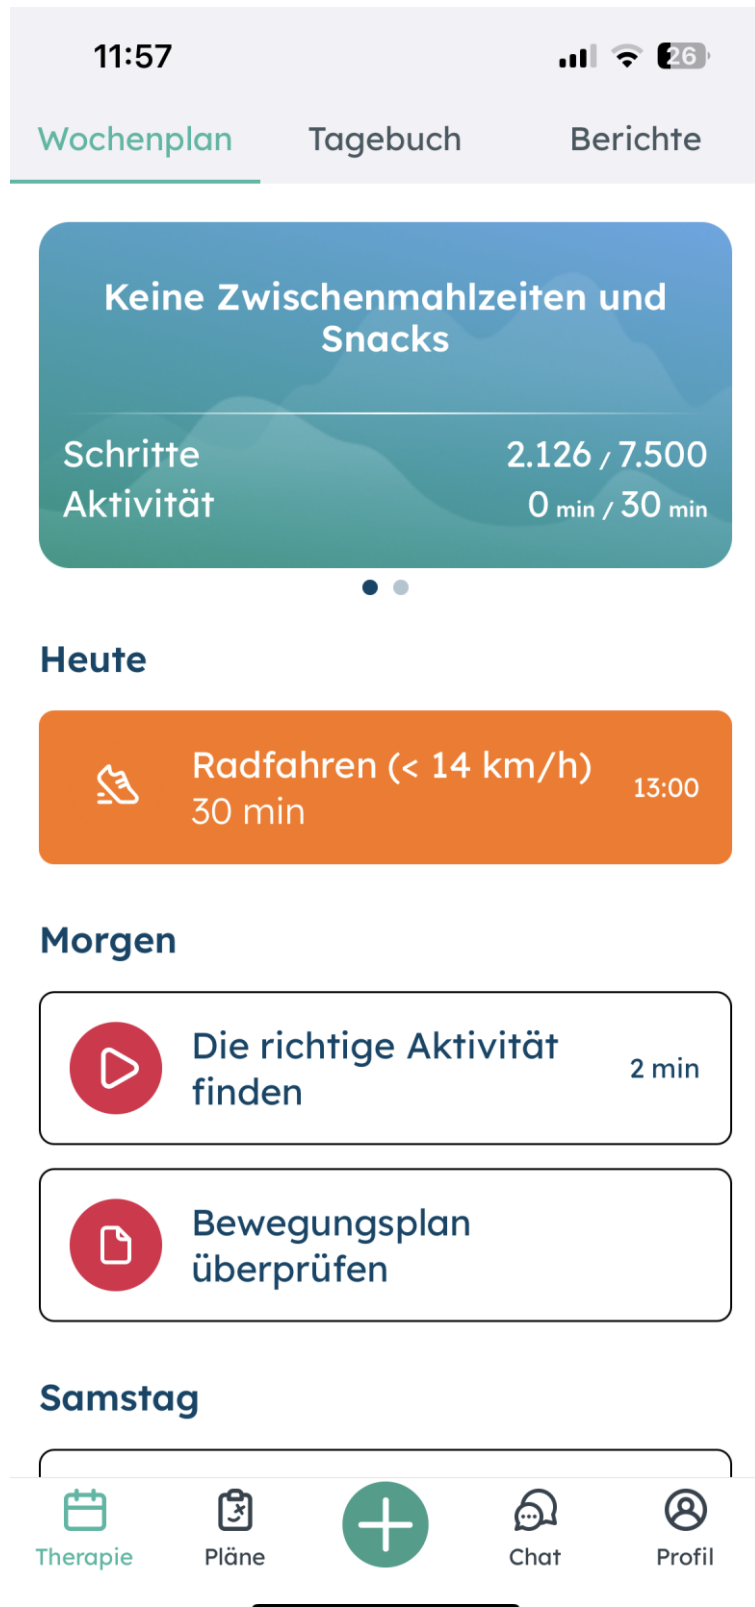

**Figure S2.** Weekly plan with personal (daily) activity goals and tracking.

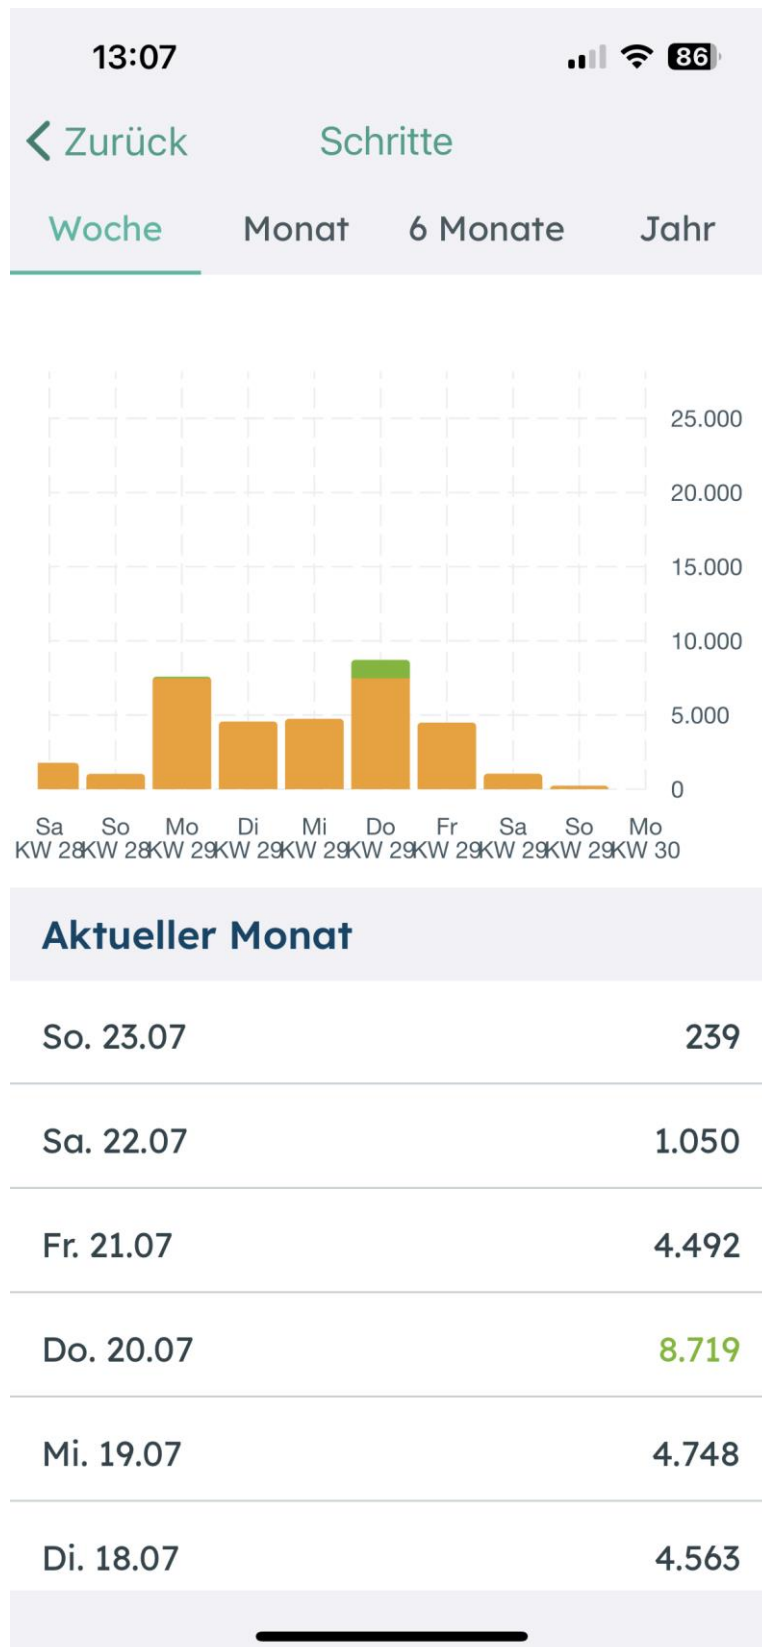

Figure S3. Step count overview.

16:15

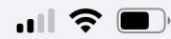

< Zurück

## Der Dominoeffekt

Erfahren Sie hier mehr über die Folgeerkrankungen von Diabetes und welche Risikofaktoren dazu führen.

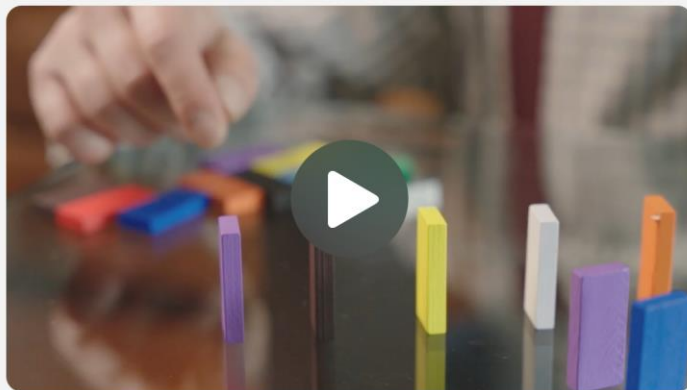

Weiter

**Figure S4.** Example for educational video content.
